# Supplementary material
Source: Frontiers journal article supplement (https://www.frontiersin.org/articles/438733)
Supplement: Data_Sheet_1.pdf [file Data_Sheet_1.pdf]

# Frontiers in Built Environment

## Specialty section on Construction Management

### A benefits prioritisation analysis on adopting BIM systems against major challenges in megaproject delivery

Zhen Chen<sup>1\*</sup>, Andrew Agapiou<sup>2</sup>, and Heng Li<sup>3</sup>

#### Supplemental Data

#### The questionnaire used in this experimental study

##### Section 1: General Information

**1. What is your company's role in megaproject development?**

- ☐ Client (Project investment decision-maker; Project owner; Project sponsor)
- ☐ Project Manager (In-house or consultant)
- ☐ Design Team (Architects; Engineers; Technology specialists)
- ☐ Consultant (Quantity surveying; Project planning; Construction management)
- ☐ Specialist Contractor (or Subcontractor)
- ☐ Facilities Manager
- ☐ Other role/s (Please specify: \_\_\_\_\_)

**2. What is the approximate annual turnover of your company?**

\$\_\_\_\_\_million.

**3. What is your current role with the company in relation to megaproject delivery?**

- ☐ Project Support (Please specify: \_\_\_\_\_)
- ☐ Technical Professional (Please specify: \_\_\_\_\_)
- ☐ Manager (Please specify: \_\_\_\_\_)
- ☐ Executive Director (Please specify: \_\_\_\_\_)
- ☐ Other role/s (Please specify: \_\_\_\_\_)

**4. What is your level of experience in megaproject delivery?**

- ☐ Less than 2 years
- ☐ 2 – 5 years
- ☐ 5 – 10 years
- ☐ 10 – 20 years
- ☐ 20+ years

---

<sup>1</sup> Lecturer in Construction Management, Department of Architecture, University of Strathclyde, 75 Montrose Street, Glasgow, G1 1XJ, UK

\* *Corresponding author.* Phone: +44 (0)7532075319. E-mail: z.chen@live.com

<sup>2</sup> Senior Lecturer, Department of Architecture, University of Strathclyde, 75 Montrose Street, Glasgow, G1 1XJ, UK. E-mail: andrew.agapiou@strath.ac.uk

<sup>3</sup> Chair Professor, Department of Building and Real Estate, The Hong Kong Polytechnic University, 11 Yuk Choi Road, Hung Hom, Hong Kong, China. E-mail: heng.li@polyu.edu.hk

**5. How would you categorise your megaproject experiences?**

- ☐ Buildings
- ☐ Transport
- ☐ Energy (Oil and Gas)
- ☐ Mining and Resources
- ☐ Other type/s (Please specify: \_\_\_\_\_)

**6. Tender price of your current or most recent megaproject?**

\$\_\_\_\_\_million

**7. Contract period of the project?**

\_\_\_\_\_ years

Please specify the start and finish time (mm/yyyy): from \_\_\_\_\_ until \_\_\_\_\_

**8. Please identify any major climatic impacts to the project which occurred over the course of the contract period.**

\_\_\_\_\_

**Section 2: BIM and your company in the context of current or the most recent megaproject delivery**

**9. Was willingness to implement BIM a prerequisite to winning the contract?**

- ☐ Yes (Please provide details: \_\_\_\_\_)
- ☐ No

**10. Had your company worked with BIM prior to this particular project?**

- ☐ Yes (Please provide details: \_\_\_\_\_)
- ☐ No

**11. Did your company already have standard procedures for the implementation and use of BIM in place?**

- ☐ Yes (Please provide details: \_\_\_\_\_)
- ☐ No

**12. What was the approximate tangible cost impact to your company as a result of BIM use on the project (e.g. software, human resources etc.)?**

\$\_\_\_\_\_million

**13. What were the semi tangible and intangible costs to your company as a result of BIM use on the project (eg. changes to project workflows, re-training of staff)? Please detail, and assign an approximate total value.**

Details: \_\_\_\_\_

\$\_\_\_\_\_million

**14. Was the BIM implemented and updated across all phases of the project lifecycle?**

- ☐ Yes (Please provide details: \_\_\_\_\_)
- ☐ No (Please provide details: \_\_\_\_\_)

**15. What benefits did your company achieve in terms of costs and value by deploying the use of BIM on the project? (Please tick all that may apply)**

- ☐ Capital cost savings (Please specify: \$\_\_\_\_\_)

- ☐ Operating cost savings (Please specify: \$\_\_\_\_\_)
- ☐ Time savings (Please specify: \_\_\_\_\_ weeks)
- ☐ Enhanced design capacity (Please specify: \_\_\_\_\_)
- ☐ Flexibility and the ability to facilitate changes (Please specify: \_\_\_\_\_)
- ☐ Improved quality (Please specify: \_\_\_\_\_)
- ☐ Improved safety performance (Please specify: \_\_\_\_\_)
- ☐ Environmental benefits (Please specify: \_\_\_\_\_)
- ☐ Exchange/resale benefits (Please specify: \_\_\_\_\_)
- ☐ Community support (Please specify: \_\_\_\_\_)
- ☐ Accuracy and consistency of data (Please specify: \_\_\_\_\_)
- ☐ Improved collaboration and communication (Please specify: \_\_\_\_\_)
- ☐ Multidisciplinary planning and coordination (Please specify: \_\_\_\_\_)
- ☐ Enhanced performance analysis capabilities (Please specify: \_\_\_\_\_)
- ☐ Other benefit/s (Please specify: \_\_\_\_\_)

**16. With the benefit of hindsight, would you use BIM on this type of project again?**

☐ Yes

☐ No

Please explain: \_\_\_\_\_

**17. What would you do differently in your next megaproject in terms of the use of BIM?**

\_\_\_\_\_

### Section 3: BIM and other megaproject stakeholders

**18. Which of the other project stakeholders had worked with BIM prior to this particular project, if any? (Please tick all that may apply)**

- ☐ Client (e.g. Project investment decision-maker; Project owner; Project sponsor)
- ☐ Project Manager (In-house or consultant)
- ☐ Design Team (e.g. Architects; Engineers; Technology specialists)
- ☐ Consultant (e.g. Quantity surveying; Project planning; Construction management)
- ☐ Specialist Contractor (or Subcontractor)
- ☐ Facilities Manager
- ☐ Other role/s (Please specify: \_\_\_\_\_)

**19. Did any of those companies already have standard procedures for the implementation and use of BIM in place?**

☐ Yes (Provide details regarding each of the stakeholders ticked above: \_\_\_\_\_)

☐ No

**20. Please provide an estimate of the tangible cost impact to all project stakeholders as a result of BIM use on the project.**

- |                                                               |                 |                                   |                                   |
|---------------------------------------------------------------|-----------------|-----------------------------------|-----------------------------------|
| <input type="checkbox"/> Client                               | \$_____million, | <input type="checkbox"/> Decrease | <input type="checkbox"/> Increase |
| <input type="checkbox"/> Project Manager                      | \$_____million, | <input type="checkbox"/> Decrease | <input type="checkbox"/> Increase |
| <input type="checkbox"/> Design Team                          | \$_____million, | <input type="checkbox"/> Decrease | <input type="checkbox"/> Increase |
| <input type="checkbox"/> Consultant                           | \$_____million, | <input type="checkbox"/> Decrease | <input type="checkbox"/> Increase |
| <input type="checkbox"/> Specialist Contractor                | \$_____million, | <input type="checkbox"/> Decrease | <input type="checkbox"/> Increase |
| <input type="checkbox"/> Facilities Manager                   | \$_____million, | <input type="checkbox"/> Decrease | <input type="checkbox"/> Increase |
| <input type="checkbox"/> Other role/s (Please specify: _____) |                 |                                   |                                   |

**21. What benefits do you perceive that other project stakeholders achieved in terms of costs and value by deploying the use of BIM on the project? (Please tick all that may apply)**

- ☐ Capital cost savings (Please specify: \$\_\_\_\_\_)
- ☐ Operating cost savings (Please specify: \$\_\_\_\_\_)
- ☐ Time savings (Please specify: \_\_\_\_\_ weeks)
- ☐ Enhanced design capacity (Please specify: \_\_\_\_\_)
- ☐ Flexibility and the ability to facilitate changes (Please specify: \_\_\_\_\_)
- ☐ Improved quality (Please specify: \_\_\_\_\_)
- ☐ Improved safety performance (Please specify: \_\_\_\_\_)
- ☐ Environmental benefits (Please specify: \_\_\_\_\_)
- ☐ Exchange/resale benefits (Please specify: \_\_\_\_\_)
- ☐ Community support (Please specify: \_\_\_\_\_)
- ☐ Accuracy and consistency of data (Please specify: \_\_\_\_\_)
- ☐ Improved collaboration and communication (Please specify: \_\_\_\_\_)
- ☐ Multidisciplinary planning and coordination (Please specify: \_\_\_\_\_)
- ☐ Enhanced performance analysis capabilities (Please specify: \_\_\_\_\_)
- ☐ Other benefit/s (Please specify: \_\_\_\_\_)

**22. Which project stakeholders do you believe achieved the most value from using BIM? (Please tick all that may apply)**

- ☐ Client (e.g. Project investment decision-maker; Project owner; Project sponsor)
- ☐ Project Manager (In-house or consultant)
- ☐ Design Team (e.g. Architects; Engineers; Technology specialists)
- ☐ Consultant (e.g. Quantity surveying; Project planning; Construction management)
- ☐ Specialist Contractor (or Subcontractor)
- ☐ Facilities Manager
- ☐ Other role/s (Please specify: \_\_\_\_\_)

**23. Please provide any other comments.**

\_\_\_\_\_

**Section 4: Contact details**

**Please provide your contact details should you wish to receive the results of the study.**

Name: \_\_\_\_\_

Email: \_\_\_\_\_

**Citation:** Chen Z, Agapiou A and Li H (2020) A Benefits Prioritization Analysis on Adopting BIM Systems against Major Challenges in Megaproject Delivery. *Front. Built Environ.* 6:26. doi: 10.3389/fbuil.2020.00026

**Acknowledgment:** Special thanks to Mrs Lisa Brunsdon in Australia for her valuable contribution to the research described in this article.
